# Supplementary material for: Monitoring the effect of perioperative nutritional care on body composition and functional status in patients with carcinoma of gastrointestinal and hepatobiliary system and pancreas
Source: PubMed Central journal article supplement (PMC10561066; doi:10.2478/raon-2023-0028), 2023-07-13
Supplement: raon-2023-0028_sm.pdf [file raon-2023-0028_sm.pdf]

# Monitoring the effect of perioperative nutritional care on body composition and functional status in patients with carcinoma of gastrointestinal and hepatobiliary system and pancreas

Andrej Gyergyek, Nada Rotovnik Kozjek, Jasna Klen

Radiol Oncol 2023; 57(3): 371-379.

doi: 10.2478/raon-2023-0028

**SUPPLEMENTARY TABLE 1.** Baseline demographic and clinical characteristics of participants (n = 47)

| Variable                                                          | All participants<br>N = 47 | First<br>group<br>N = 27 | Second group<br>N = 20 | P     |
|-------------------------------------------------------------------|----------------------------|--------------------------|------------------------|-------|
| <b>Gender</b>                                                     |                            |                          |                        |       |
| Male, N (%)                                                       | 33 (70.2)                  | 21 (77.8)                | 12 (60.0)              | 0.214 |
| Female, N (%)                                                     | 14 (29.8)                  | 6 (22.2)                 | 8 (40.0)               |       |
| <b>Age</b> , years, median (25–75%)                               | 72 (64–80)                 | 72 (64–82)               | 72 (65–77)             | 0.477 |
| <b>Diagnosis</b>                                                  |                            |                          |                        |       |
| GIT tumours, N (%)                                                | 27 (57.4)                  | 15 (55.6)                | 12 (60.0)              | 1.000 |
| Tumours of liver, gallbladder, biliary system and pancreas, N (%) | 20 (42.6)                  | 12 (44.4)                | 8 (40.0)               |       |

GIT = Gastrointestinal tract

**SUPPLEMENTARY TABLE 2.** Clinical characteristics of participants upon enrolment into the study

| Variable                                               | First group<br>N = 27 | Second group<br>N = 20 | P     |
|--------------------------------------------------------|-----------------------|------------------------|-------|
| <b>Body mass</b> , kg, median (25–75%)                 | 82.0 (70.0–98.0)      | 78.5 (72.3–88.3)       | 0.268 |
| <b>BMI</b> , kg/m <sup>2</sup> , median (25–75%)       | 26.2 (23.4–34.5)      | 27.5 (24.3–29.6)       | 0.569 |
| <b>Lean mass</b> , kg, median (25–75%)                 | 53.1 (47.1–64.2)      | 53.9 (45.0–59.6)       | 0.505 |
| <b>FFMI</b> , median (25–75%)                          | 17.8 (16.4–20.3)      | 17.6 (15.9–20.4)       | 0.561 |
| <b>Phase angle</b> , °, median (25–75%)                | 4.7 (4.3–5.4)         | 4.6 (4.0–5.5)          | 0.846 |
| <b>3<sup>rd</sup> space water</b> , L, median (25–75%) | -0.1 (-0.8–1.0)       | 0.4 (-0.4–0.9)         | 0.425 |
| <b>Hand grip strength</b> , kg, median (25–75%)        | 34.1 (28.5–41.6)      | /                      |       |
| <b>Hand grip strength norm</b>                         |                       | /                      |       |
| No, N (%)                                              | 19 (70.4)             | /                      |       |
| Yes, N (%)                                             | 8 (29.6)              | /                      |       |
| <b>Hand grip strength: deviation</b> , median (25–75%) | 0.2 (-0.1–1.2)        | /                      |       |
| <b>Points</b> , median (25–75%)                        | 2 (0–3)               | 3 (3–3.8)              | 0.012 |
| <b>Malnutrition according to GLIM</b>                  |                       |                        |       |
| No, N (%)                                              | 14 (51.9)             | 16 (80.0)              | 0.067 |
| Yes, N (%)                                             | 13 (48.1)             | 4 (20.0)               |       |

BMI = body mass index; FFMI = fat free mass index; GLIM = Global Leadership in Malnutrition criteria; Hand grip strength norm = patients meets the norm for hand grip strength for age and sex; Hand grip strength deviation = deviation of hand grip strength from the norm expressed as a multiple of standard deviation; NRS = Nutritional Risk Screening

/ = No data for this group

SUPPLEMENTARY TABLE 3. Clinical characteristics of participants after 7 days

| Variable                                               | First group<br>N=11 [16] | Second group<br>N=18 [2] | P     |
|--------------------------------------------------------|--------------------------|--------------------------|-------|
| <b>Body mass</b> , kg, median (25–75%)                 | 72.0 (67.8–93.2)         | 76.4 (68.5–85.6)         | 0.912 |
| <b>BMI</b> , kg/m <sup>2</sup> , median (25–75%)       | 25.4 (22.7–36.1)         | 26.8 (24.1–29.0)         | 0.808 |
| <b>Lean mass</b> , kg, median (25–75%)                 | 52.0 (48.2–53.2)         | 52.0 (41.9–57.1)         | 0.842 |
| <b>FFMI</b> , median (25–75%)                          | 17.8 (16.5–20.8)         | 17.4 (15.8–19.0)         | 0.340 |
| <b>Phase angle</b> , °, median (25–75%)                | 4.3 (3.5–4.9)            | 4.4 (3.3–5.1)            | 0.947 |
| <b>3<sup>rd</sup> space water</b> , L, median (25–75%) | 0.7 (-0.3–1.6)           | 0.4 (-0.6–1.0)           | 0.642 |

BMI = body mass index; FFMI = fat free mass index;

[number of missing participants in each group]

SUPPLEMENTARY TABLE 4. Clinical characteristics of participants after 14 days

| Variable                                                  | First group<br>N = 19 [8] | Second group<br>N = 18 [2] | P     |
|-----------------------------------------------------------|---------------------------|----------------------------|-------|
| <b>Body mass</b> , kg, median (25–75%)                    | 73.0 (65.0–92.0)          | 75.5 (70–84.5)             | 0.869 |
| <b>BMI</b> , kg/m <sup>2</sup> , median (25–75%)          | 25 (22.5–34.1)            | 26.4 (22–28.9)             | 0.620 |
| <b>Lean mass</b> , kg, median (25–75%)                    | 50.1 (46.4–52.1)          | 53.2 (45–58)               | 0.707 |
| <b>FFMI</b> , median (25–75%)                             | 16.8 (15.8–19.4)          | 17.4 (15.6–19.6)           | 1.000 |
| <b>Phase angle</b> , °, median (25–75%)                   | 4.4 (4.1–5)               | 4.2 (3.6–4.7)              | 0.461 |
| <b>3<sup>rd</sup> space water</b> , L,<br>median (25–75%) | 0.5 (-0.4–1.4)            | 0.2 (-0.1–1)               | 0.988 |
| <b>Hand grip strength*</b> , kg,<br>median (25–75%)       | 30.2 (25–35.3)            | 30.3 (25.8–36.8)           | 0.782 |
| <b>Hand grip strength norm*</b>                           |                           |                            |       |
| No, N (%)                                                 | 11 (61.1)                 | 9 (52.9)                   | 0.738 |
| Yes, N (%)                                                | 8 (47.1)                  | 7 (38.9)                   |       |
| <b>Hand grip strength deviation*</b> ,<br>median (25–75%) | 0.1 (-0.5–0.5)            | 0.3 (-0.4–1)               | 0.369 |
| <b>NRS 2002**</b> , points,<br>median (25–75%)            | 4 (3–4.3)                 | 4 (3–4.5)                  | 0.961 |

BMI = body mass index; FFMI = fat free mass index; Hand grip strength: norm = patients meets the norm for hand grip strength for age and sex; Hand grip strength deviation = deviation of hand grip strength from the norm expressed as a multiple of standard deviation; N 0 number; NRS 2002 = score achieved on screening with Nutritional Risk Screening 2002 tool;

[number of missing participants];

\*additional missing data for 1 participant in first and 1 in second group; \*\*additional missing data for 2 participants in first group

SUPPLEMENTARY TABLE 5. Clinical characteristics of participants after 4 weeks

| Variable                                        | First group<br>N = 15 [12] | Second group<br>N = 13 [7] | P     |
|-------------------------------------------------|----------------------------|----------------------------|-------|
| Body mass, kg, median (25–75%)                  | 69.4 (66–76.8)             | 75 (72.5–86.5)             | 0.130 |
| BMI, kg/m <sup>2</sup> , median (25–75%)        | 23.8 (21.7–27.2)           | 26 (23–29.5)               | 0.413 |
| Lean mass, kg, median (25–75%)                  | 48.4 (41.7–50.6)           | 55 (46.5–60.2)             | 0.065 |
| FFMI, median (25–75%)                           | 16.5 (15.1–17.5)           | 18.8 (15.9–19.8)           | 0.118 |
| Phase angle, °, median (25–75%)                 | 4.8 (3.7–5.3)              | 4.4 (3.3–4.7)              | 0.201 |
| 3 <sup>rd</sup> space water, L, median (25–75%) | 0.4 (-0.2–1.1)             | 0.4 (-0.2–1.3)             | 0.928 |
| Hand grip strength*, kg, median (25–75%)        | 29.7 (23.6–32.7)           | 32.6 (27.3–35.6)           | 0.254 |
| <b>Hand grip strength norm*</b>                 |                            |                            |       |
| No, N (%)                                       | 8 (53.3)                   | 8 (61.5)                   | 0.718 |
| Yes, N (%)                                      | 7 (46.7)                   | 5 (38.5)                   |       |
| Hand grip strength: deviation*, median (25–75%) | 0.1 (-0.7–0.3)             | 0.3 (-0.8–0.8)             | 0.683 |
| NRS 2002**, points, median (25–75%)             | 4 (3–5)                    | 3 (3–4)                    | 0.235 |

BMI = body mass index; FFMI = fat free mass index; Hand grip strength norm = patients meets the norm for hand grip strength for age and sex; Hand grip strength: deviation = deviation of hand grip strength from the norm expressed as a multiple of standard deviation; N = number; NRS 2002 = score achieved on screening with Nutritional Risk Screening 2002 tool;

[number of missing participants].

Relative differences between the two groups when compared to the starting values

SUPPLEMENTARY TABLE 6. Relative changes in clinical characteristics of participants after 7 days

| Variable                    |                    | First group<br>N = 11 | Second group<br>N = 18 | P     |
|-----------------------------|--------------------|-----------------------|------------------------|-------|
| Body mass                   | %, median (25–75%) | 0.0 (-1.9–2.0)        | -2.7 (-5.0–0.9)        | 0.220 |
| BMI                         | %, median (25–75%) | 0.0 (-1.9–2.0)        | -2.7 (-5.0–0.9)        | 0.220 |
| Lean mass                   | %, median (25–75%) | 4.2 (-1.1–17.3)       | -2.1 (-5.5–1.7)        | 0.039 |
| FFMI                        | %, median (25–75%) | 4.3 (-1.3–12.7)       | -2.3 (-6.9–1.6)        | 0.035 |
| Phase angle                 | %, median (25–75%) | 0.0 (-23.4–5.4)       | -4.4 (-16.9–0.0)       | 0.774 |
| 3 <sup>rd</sup> space water | %, median (25–75%) | -22.2 (-100.0–28.6)   | 11.1 (-48.4–45.8)*     | 0.342 |

BMI = body mass index; FFMI = fat free mass index; \*data missing for 2 participants

SUPPLEMENTARY TABLE 7. Relative changes in clinical characteristics of participants after 14 days

| Variable                    |                    | First group<br>N = 19 | Second group<br>N = 18 | P     |
|-----------------------------|--------------------|-----------------------|------------------------|-------|
| Body mass                   | %, median (25–75%) | -3.2 (-6.1–0)         | -5.6 (-7.9 to -2.5)    | 0.313 |
| BMI                         | %, median (25–75%) | -3.2 (-6.1–0)         | -5.6 (-7.9 to -2.5)    | 0.313 |
| Lean mass                   | %, median (25–75%) | -2.1 (-7.4–1.2)       | -5.5 (-7.5 to -0.6)    | 0.245 |
| FFMI                        | %, median (25–75%) | -2.5 (-7.4–1.2)       | -5.4 (-7.9 to -0.9)    | 0.245 |
| Phase angle                 | %, median (25–75%) | -6.7 (-7.7–2.1)       | -12.3 (-15.6 to -5.1)  | 0.075 |
| 3 <sup>rd</sup> space water | %, median (25–75%) | -5.6 (-73.7–103.6)*   | -20 (-83.7 to 18.9)*   | 0.546 |

BMI = body mass index; FFMI = Fat free mass index; \*data missing for 1 participant

SUPPLEMENTARY TABLE 8. Relative changes in clinical characteristics of participants after 4 weeks

| Variable                    |                    | First group<br>N=15 | Second group<br>N=13    | P     |
|-----------------------------|--------------------|---------------------|-------------------------|-------|
| Body mass                   | %, median (25–75%) | -2.8 (-6.9–0.9)     | -3.9 (-6.5 to -0.2)     | 0.821 |
| BMI                         | %, median (25–75%) | -2.8 (-6.9–0.9)     | -3.9 (-6.5 to -0.2)     | 0.821 |
| Lean mass                   | %, median (25–75%) | -2.7 (-8–1.2)       | -2.4 (-5.7 to 0.5)      | 0.856 |
| FFMI                        | %, median (25–75%) | -2.9 (-7.7–0)       | -2.3 (-5.5 to 0.4)      | 0.717 |
| Phase angle                 | %, median (25–75%) | -1.8 (-12.8–9.1)    | -9.8 (-18.3 to -5.9)    | 0.088 |
| 3 <sup>rd</sup> space water | %, median (25–75%) | -25 (-60–10)        | -43.8 (-150.8 to -8.1)* | 0.256 |

BMI = body mass index; FFMI = fat free mass index; \*data missing for 1 participant
